**Background:** Catheter ablation for paroxysmal atrial fibrillation (AF) is an established therapy in selected patients. It has been shown, that long-term outcome was related to left atrial (LA) size. The aim of study was to identify, if CARTO related left atrial volume (LAV) predicts clinical outcome of catheter ablation for atrial fibrillation in real-life population.

**Methods:** An analysis was performed in 709 consecutive patients (61 ± 10 years; 64% males; and 64% persistent) referred to catheter ablation for drug resistant symptomatic AF in one center.

**Results:** Out of all patients, 589 (83%) were classified as good rhythm control (either with or without antiarrhythmic medication) after mean follow-up of 28 ± 25 month. Mean number of procedures was 1.3 ± 0.6 per one patient. When compared to patients with good arrhythmia control patients with recurrent AF had more enlarged LA (LAV 136 ± 43 vs. 118 ± 36 ml), were older (67 ± 10 vs. 61 ± 9 years) and had more frequently history of heart failure (14% vs. 7%);  $p < 0.05$ . Side to age and history of heart failure, LAV was identified as independent predictor of treatment failure ( $p < 0.05$ ). The sensitivity and specificity of LAV estimated by CARTO above median (115ml) to identify patients without good arrhythmia control was 54% and 63%.

**Conclusion:** Despite LAV estimated by CARTO was identified as independent predictor of clinical outcome, its sensitivity and specificity seem to be low.

### P364

#### Presence of low voltage zone areas is associated with lower AF recurrence in patients undergoing re-ablation with substrate modification

Y. Huo; MB. Kronborg; S. Ulbrich; A. Zedda; J. Mayer; L. Pu; J. Guo; U. Richter; J. Sitzy; T. Gaspar; C. Piorkowski

Dresden University of Technology, Heart Center University Hospital, Dresden, Germany

**Background:** Presence of low voltage zones (LVZ) in the left atrium during high-density bipolar voltage mapping (HD-BVM) indicates fibro-fatty infiltration which is an important determinant for initiation and maintenance of atrial fibrillation (AF). Left atrial substrate modification (LASM) targeting LVZ in addition to pulmonary vein isolation (PVI) is an ablation strategy that tries to eliminate these areas to reduce recurrence. However, even after successful LASM and PVI there is a relative high rate of recurrence. Important factors at re-ablation such as PV reconnection or untreated LVZ might explain failure in some of these patients.

**Objective:** To study mapping related predictors of AF recurrence during re-ablation in a cohort of patients treated with PVI and LASM and further to compare differences in recurrence rates after re-ablation procedures and 1st ablation only procedures.

**Methods:** We included patients who were re-ablated for paroxysmal or persistent AF from January 2014 to May 2017. As a control group we included patients undergoing 1st time only ablation in the same period, with an implantable loop recorder. Patients undergoing re-ablation were followed with continuous monitoring in 82% and periodic Holter monitoring in 18% of the patients. At all procedures a HD-BVM was performed in sinus rhythm before ablation and areas displaying voltage  $< 0.5$  mV was categorized as LVZ. At the re-ablation procedure re-conduction to PVs were registered. The endpoint was time to first episode of any atrial arrhythmia. Mapping related variables at re-ablation included isolated PVs and presence of LVZ. Data are presented as absolute number and percentages and adjusted Hazard Ratios (aHR) with 95% CI adjusting for the following variables; CHA<sub>2</sub>DS<sub>2</sub> VASc score with gender entered independently and arrhythmia recurrence (paroxysmal/persistent).

**Results:** A total of 100 patients (age 68 ± 10, 62% male, 33% paroxysmal) undergoing re-ablation followed for 12 ± 10 months and 389 patients (age 65 ± 12, 57% male, 53% paroxysmal) undergoing 1st ablation only followed for 15 ± 10 months were included in the analysis. The 12 months freedom from arrhythmia recurrence was 54% (43-63) after re-ablation and 54% (49-59) after 1st ablation only. At re-ablation presence of LVZ (aHR; 0.50, 0.25-1.0,  $p=0.049$ ) was associated with lower recurrence as was reconnection to the PVs (aHR; 0.60, 0.34-1.80,  $p=0.087$ ), although it did not reach statistical significance. However in patients undergoing 1st ablation LVZ was associated with a higher recurrence rate (aHR; 1.5, 1.1-2.0,  $p=0.011$ ). Patients with LVZ at re-ablation had a lower recurrence rate as compared to patients with LVZ at 1st ablation (aHR; 0.53, 0.34-0.82,  $p=0.005$ ).

**Conclusion:** In a patient cohort undergoing re-ablation including PVI and LASM, presence of LVZ is associated with lower arrhythmia recurrence as compared to both patients without LVZ at re-ablation and patients with LVZ undergoing first ablation.

### P365

#### First-in-human experience with ablation index to perform left atrial anterior line in patients with persistent atrial fibrillation

F. Santoro; A. Metzner; B. Reissmann; T. Maurer; T. Fink; CH. Heeger; C. Lemes; S. Mathew; F. Ouyang; KH. Kuck; A. Rillig

Asklepios Clinic St. Georg, Department of Cardiology, Hamburg, Germany

**Background:** Ablation Index (AI) is a novel ablation quality marker that incorporates contact force (CF), time and power in a weighted formula to provide accurate information about lesion formation for pulmonary vein isolation (PVI). However, this index has still not been evaluated for other left atrial procedures such as an anterior line. The aim of this study was, to evaluate the feasibility of AI for left atrial anterior wall ablation.

**Methods:** During PVI procedures, an individual AI was used for all pulmonary vein (PV) segments (anterior =510, posterior=380, inferior=380, roof=410 and ridge=510) from one experienced operator. Thereafter a left atrial anterior wall AI was measured after retrospective evaluation of 10 consecutive procedures. Median AI for

the left atrial anterior wall was 490 ± 80. Thus, AI target was 500 (400-550) with 30 watt. A Smart-touch SF 56 ablation catheter was used in all these procedures.

**Results:** Ten consecutive patients with symptomatic drug-refractory persistent AF undergoing radiofrequency catheter ablation (mean age: 70 ± 6 years; n=7/10 (70%) male) were enrolled. After PVI, an anterior line ablation was performed. Bidirectional block of the anterior line was confirmed after application of 19 ± 5 RF applications and overall RF application duration was 9.3 ± 2.3 minutes.

Although AI between the anterior segments of PV and the left anterior wall was similar (510 vs 500), mainly due to similar average force (19.2 ± 12.8 vs 22.8 ± 15 gr  $p=0.10$ ) and mean power (28.3 ± 4.9 vs 28 ± 5 Watt  $p=0.88$ ), we found in the anterior segment of the PVs higher values of baseline impedance (125.2 ± 8.4 vs 119.5 ± 10.4  $\Omega$   $p=0.01$ ), impedance drop (11.2 ± 5.7 vs 9 ± 4.6  $\Omega$   $p=0.01$ ) and maximal temperature achieved (34 ± 1.1 vs 33 ± 2°  $p=0.02$ ).

**Conclusion:** Ablation index for left atrial segments over the pulmonary vein is feasible however may not be able to discriminate some tissue difference.

### P366

#### Radiofrequency catheter ablation technology to improve lesion formation

T. Rattanakit; D. Lau; D. Linz; T. Agbaedeng; P. Sanders; R. Mahajan  
South Australian Health and Medical Research Institute, Centre of Heart Rhythm Disorder, Adelaide, Australia

**Funding Acknowledgements:** Centre of Heart Rhythm Disorder

**Introduction:** Radiofrequency Catheter Ablation (RFCA) is the mainstay of invasive treatment of cardiac arrhythmias, particularly atrial fibrillation (AF). Despite the dramatic technological advances in RFCA, achievement of complete Pulmonary Vein Isolation (PVI) remains a challenge.

**Purpose:** To systematically evaluate current RFCA technology to provide therapeutic intervention and recommendations on the basis of the existing evidence.

**Methods:** A systematic literature search, in English, was conducted on Ovid MEDLINE, Embase and PubMed with the keywords "radiofrequency catheter ablation", "contact-force", "irrigated", "lesion formation" and "atrial fibrillation" up to 16 October 2017. Studies evaluating RFCA in lesion formation and factors influencing ablation outcome, such as power delivery, temperature, procedure time, impedance and radiation exposure were included. Clinical studies were evaluated for quality and risk of bias using the Cochrane Collaborations' tool and/or Newcastle-Ottawa scale.

**Results:** A total of 15 studies met our inclusion criteria, corresponding to 1,595 participants. We found two studies reporting on lesions, with one drawn from a randomised controlled, double-blind, trial and one from observational design. These demonstrated better lesions with contact force (CF)-guided circumferential PVI compared to non-guided ablation, and 8-mm tip and cooled-tip (40W) as compared to cooled-tip at 30W. Additionally, animal studies also revealed that the higher CF influences lesion depth, which is the key to lesion transmural. Four studies reported CF-sensing vs non-CF catheters, mostly of observation cohorts and one RCT. Interestingly, CF catheters demonstrated a significant positive ablation outcomes compared to standard catheters, with almost 50% reduction in procedure and fluoroscopy times reported.

**Conclusions:** The systematic review showed the evaluation of current available RFCA and the procedure outcome to assist in future catheter intervention. CF-sensing catheter demonstrated better ablation effectiveness and efficacy more than non-sensing catheters. However, despite the development of these novel catheters, AF recurrence remains high, which warrant newer techniques to ensure transmural lesions to achieve complete PVI.

| Reference                         | Design        | Intervention                                     | Main results                                  | Procedural parameters             |                                       |                                     | AF/AF recurrence            |
|-----------------------------------|---------------|--------------------------------------------------|-----------------------------------------------|-----------------------------------|---------------------------------------|-------------------------------------|-----------------------------|
|                                   |               |                                                  |                                               | Temperature/power                 | Procedure time                        | Fluoroscopy                         |                             |
|                                   |               |                                                  |                                               | Lesion Size Endpoint              |                                       |                                     |                             |
| Kimura et al. 2014                | RCT           | CF-guided CPVI vs non-guided                     | More lesions by CF                            | 25 to 30 W                        | 591.16 min vs 564.79 min; $p=0.01$    | 9:20h vs 22:04h; $p=NS$             | 5.3% vs 35.8%; $p=0.34$     |
| Mattila et al. 2008               | Observational | 8-mm tip vs cooled tip (30W) vs cooled tip (40W) | Temp: 4.3±2.4 vs 2.5±1.3 vs 5.6±2.3; $p=0.02$ | 55 °C/25w vs 45°C/30w vs 45°C/40w | 128±31 min                            | 27±8 min                            | 47% vs 65% vs 49%; $p=0.03$ |
| Contact Force vs Non-CF Catheters |               |                                                  |                                               |                                   |                                       |                                     |                             |
| Bordy et al. 2015                 | RCT           | CF-sensing vs SAC                                | 100% PVI Short-term; $p=NS$                   | —                                 | 46.5 vs 53.2 min; $p=0.02$            | 27.0 vs 23.0 min; $p=0.08$          | 67.8% vs 69.4%; $p=NS$      |
| Mattila et al. 2012               | Prospective   | PVI with CF vs SAC                               | Reduced impedance; $p=0.02$                   | —                                 | 78.1±7.2 vs 95.3±7.4 min; $p=0.05$    | 33.0±2.7 vs 31.4±3.3 min; $p=0.01$  | 40.8 vs 37.1 %; $p=NS$      |
| Kumar et al. 2014                 | —             | CF vs. irrigated                                 | —                                             | 25w/40°C                          | —                                     | —                                   | —                           |
| Wahle et al. 2014                 | Pilot         | >20 g vs <10 g CF                                | —                                             | 30w-35w                           | 92.0±23.0 vs 100.0±67.0 min; $p=0.01$ | 17.5±33.0 vs 11.0±7.7 min; $p=0.01$ | —                           |
| Open-irrigated catheters          |               |                                                  |                                               |                                   |                                       |                                     |                             |
| Mattila et al. 2012               | Non-RCT       | Open-irrigated vs CF-sensing                     | CF: reversion; $p=0.02$                       | $p=NS$                            | 154±39 vs 205±40 min; $p=0.02$        | —                                   | —                           |
| Wahle et al. 2016                 | Prospective   | eMARS vs SAC                                     | <100% PVI vs SAC                              | 30 w for both                     | 23±9 vs 35±12 min; $p=0.01$           | 31±12 vs 23±30 min; $p=0.05$        | 20% for both; $p=NS$        |
| Zachary et al. 2014               | Prospective   | Efficacy of eMARS                                | 98% PVI                                       | 25w/45°C                          | 86±29 min                             | 22.2±6.5 min                        | 34% & 23%                   |
| Gold MIA Mapping Catheters        |               |                                                  |                                               |                                   |                                       |                                     |                             |
| Gil et al. 2017                   | Non-RCT       | Efficacy of Gold-MIA                             | —                                             | 30w/60°C                          | 131±22 min                            | 20±8.1 min                          | 40% <1 year follow up       |

Abstract P366 Figure. RFCA data summary

### P367

#### Early European experience with a magnetic sensor enabled contact force-sensing catheter

JL. Lloret<sup>1</sup>; S. James<sup>2</sup>; S. Trines<sup>3</sup>; RA. Dehnavi<sup>3</sup>; JL. Merino<sup>4</sup>; D. Raine<sup>5</sup>; N. Clappers<sup>6</sup>; D. Jones<sup>5</sup>; A. Pisapia<sup>6</sup>; P. Gora<sup>9</sup>

<sup>1</sup>Clinique de l'Espérance, Mougins, France; <sup>2</sup>James Cook University Hospital, Middlesbrough, United Kingdom; <sup>3</sup>Leiden University Medical Center, Leiden, Netherlands; <sup>4</sup>University Hospital La Paz, Madrid, Spain; <sup>5</sup>John Radcliffe Hospital, Oxford, United Kingdom; <sup>6</sup>University Medical Center Utrecht, Utrecht, Netherlands;

<sup>7</sup>Harefield Hospital, London, United Kingdom; <sup>8</sup>St. Joseph Hospital of Marseille, Marseille, France; <sup>9</sup>Abbott, Minneapolis, United States of America

**Introduction:** A new sensor enabled contact force-sensing catheter received CE Mark in May 2017 (Figure 1). Procedural characteristics associated with the use of this novel ablation catheter technology across multiple centers have not yet been reported.

**Purpose:** To summarize the early European experience with this new ablation catheter technology, specifically for left and right atrial ablation procedures.

**Methods:** Non patient-identifiable procedural data associated with use of the new catheter technology was collected during the initial phases of commercialization. Left or right atrial ablation procedures were included. Procedural characteristics recorded included indication for ablation, procedure time, radiofrequency time, and concomitant device use.

**Results:** Procedural data was collected in a total of 208 cases across 38 European centers. Eight indications for ablation were represented, with de novo paroxysmal atrial fibrillation (PAF) ablation accounting for the largest portion at 63.0% of cases (Table 1). Bidirectional ablation catheters were utilized in 64.3% of cases (207/208 reporting) and a steerable sheath was used in 73.1% of cases (197/208 reporting). Within the de novo PAF ablation population, mean procedure (127/131 reporting) and RF times (128/131 reporting) were  $144.9 \pm 57.7$  and  $33.2 \pm 15.6$  minutes, respectively.

**Conclusions:** Initial European experience with this new ablation catheter technology included use for multiple left and right atrial ablation indications, including atrial fibrillation. The majority of cases utilized a steerable sheath, and use of the bidirectional version of the ablation catheter was more common than use of the unidirectional version. Procedure and RF times associated with de novo PAF ablation were in line with values previously reported for contact-force sensing catheters.

Abstract P367 Table. Indication for ablation.

| Indication for Ablation                | Number of Cases (%) |
|----------------------------------------|---------------------|
| De Novo Paroxysmal Atrial Fibrillation | 131 (63.0%)         |
| Persistent Atrial Fibrillation         | 29 (13.9%)          |
| Paroxysmal Atrial Fibrillation (Redo)  | 18 (8.6%)           |
| Typical Atrial Flutter                 | 10 (4.8%)           |
| Atypical Atrial Flutter                | 7 (3.4%)            |
| Atrial Tachycardia                     | 6 (2.9%)            |
| Left Atrial Flutter                    | 4 (1.9%)            |
| Accessory Pathway Ablation             | 2 (1.0%)            |
| AV Node Ablation                       | 1 (0.5%)            |

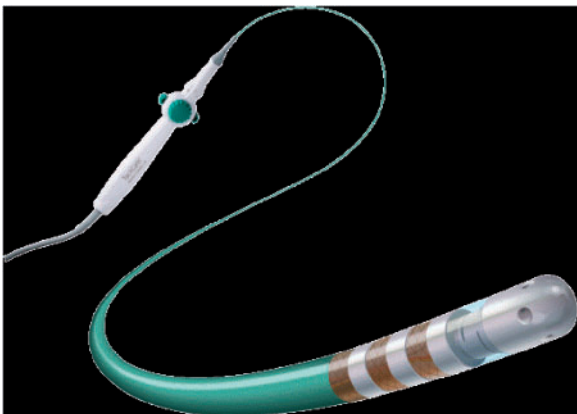

Abstract P367 Figure. Magnetic sensor contact force catheter

**P368**

**Manual catheter ablation versus robotic navigation for atrial fibrillation pulmonary vein isolation**

S. Garkina; M. Naymushin; S. Gureev; D. Lebedev  
Federal Almazov Heart, Blood and Endocrinology Centre, Saint-Petersburg, Russian Federation

**Background/Introduction:** Clinical experience with the robotic remote navigation system (RNS) is limited but literature data suggests less radiation exposure and lower intraprocedural complications rate along with non-inferior efficacy compared with conventional approaches in atrial fibrillation (AF) ablation.

**Purpose:** to investigate the acute procedural success and long-term efficacy of manual catheter pulmonary vein isolation versus robotic navigation for atrial fibrillation.

**Methods:** Eighty patients ( $56.4 \pm 12$  years) with paroxysmal atrial fibrillation underwent robotic circumferential pulmonary vein (PV) isolation with 3-dimensional left atrial reconstruction. The ablation procedure was considered to be effective if no sustained atrial tachyarrhythmias (lasting more than 30 sec) were registered during 12 months follow-up.

**Results:** Mean procedural duration and fluoroscopy time in the manual ablation (MA) group was  $164 \pm 28$  minutes and  $45 \pm 14$  minutes, respectively. The robotic ablation (RA) group was characterized by longer time of the procedure ( $200 \pm 35$  min) but lower overall ( $30 \pm 12$  min,  $p < 0.05$ ) and individual ( $18 \pm 6$  min,  $p < 0.05$ ) fluoroscopy time for operator. Nine (25%) patients of MA group and two (5%) patients of RA group had acute PV reconnection ( $p < 0.05$ ). Long-term efficacy was better in RA patients (69%) compared with those after MA (54%). There was no difference in major adverse events rate between groups.

**Conclusion:** A robotic navigation represents an alternative method of performing ablation for atrial fibrillation and is associated with significant reduction in X-ray exposure for both patient and operator, as well as lower complications risk.

Abstract P368 Table. Mean procedural and fluoroscopy duration

| Parameters                                             | RA Group<br>Procedural<br>time, min | Fluoroscopy,<br>min | MA Group<br>Procedural<br>time, min | Fluoroscopy,<br>min | P-value  |
|--------------------------------------------------------|-------------------------------------|---------------------|-------------------------------------|---------------------|----------|
| Total time                                             | $200 \pm 35$                        | $30 \pm 12$         | $164 \pm 28$                        | $45 \pm 14$         | $< 0.05$ |
| Approach time and<br>mapping                           | $36 \pm 8$                          | $15 \pm 6$          | $32 \pm 10$                         | $16 \pm 4$          | $> 0.05$ |
| Installation of robotic<br>remote navigation<br>system | $26 \pm 8$                          | $6 \pm 3$           | 0                                   | 0                   | $< 0.05$ |
| Left PV isolation                                      | $29 \pm 7$                          | $3 \pm 1$           | $34 \pm 8$                          | $11 \pm 3$          | $> 0.05$ |
| Right PV isolation                                     | $33 \pm 7$                          | $4 \pm 1$           | $22 \pm 6$                          | $9 \pm 2$           | $> 0.05$ |
| Fluoroscopy time<br>for operator                       |                                     | $18 \pm 6$          |                                     | $45 \pm 14$         | $< 0.05$ |

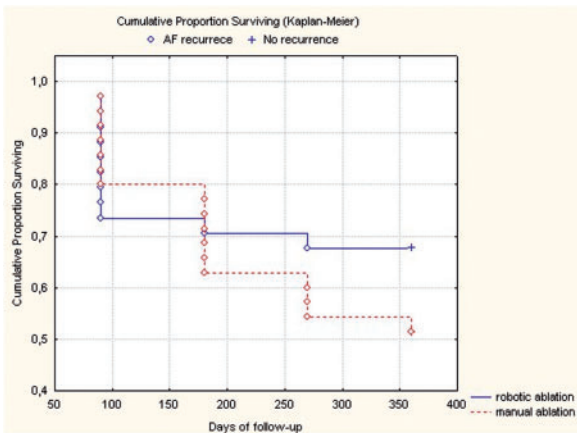

Abstract P368 Figure. Long-term efficacy

**P369**

**Comparison of three methods of activated clotting time (ACT) measurement during catheter ablation for atrial fibrillation**

V. Bulkova<sup>1</sup>; M. Fiala<sup>1</sup>; N. Rotter<sup>1</sup>; A. Mullerova<sup>1</sup>; L. Rybka<sup>1</sup>; H. Laskova<sup>2</sup>; D. Wichterle<sup>2</sup>

<sup>1</sup>Center of cardiovascular care, department of cardiology, Brno, Czech Republic;

<sup>2</sup>Institute for Clinical and Experimental Medicine (IKEM), Department of cardiology, Prague, Czech Republic

**Background:** Guidelines for atrial fibrillation (AF) management recommend optimal activated clotting time (ACT) to monitor heparin administration during AF catheter ablation; however do not specify the type of ACT meter.

**Purpose:** This study aimed at comparing ACT levels measured by 3 types of ACT meters.

**Methods:** The study included 13 patients (5 females,  $63 \pm 9$  years), who underwent catheter ablation for AF. ACT was measured simultaneously from one blood sample by 3 systems (i-STAT Abbott - ABB, Haemochron Signature Elite Accriva - HEM, ACT Plus Medtronic - MDT), and at the same time, measurement by two types of cell - „low-range“ (LR) and „high-range“ (HR) - was compared for each system. Cells differ by the used agent (Celite vs. Kaolin). Cell HEM-LR does not specify ACT levels  $\geq 400$  seconds.

**Results:** In total, 87 samples of heparinized blood were evaluated. Comparison of measurements is shown in Table. Correspondence between the ACT levels obtained from cells HR vs. LR was poor for all three systems. ACT measured by the cells HEM-HR and MDT-HR corresponded with the ACT levels from ABB-LR. Cells MDT-LR and HEM-LR are sensitive to higher heparin levels and may not be suitable for heparin levels ranging between 2.5- 6.0 IU/mL. Correlation between the ACT levels measured by HEM-HR, MDT-HR and ABB-LR were relatively weak ( $R$  0.60-0.65). In comparison with commonly used HEM-LR, the target ACT measured by HEM-HR, MDT-HR, or ABB-LR should be lowered by approximately 50, 25, and 40 seconds, respectively.
